# Supplementary material
Source: MDPI journal article supplement (https://www.mdpi.com/2227-7080/9/4/70)
Supplement: s1 [file s1]

Archive with 1 entries (1 files):
- technologies-1342637-supplementary.pdf
